# Supplementary figures and images for: Superparamagnetic Ironoxide Nanoparticles via Ligand Exchange Reactions: Organic 1,2‐Diols as Versatile Building Blocks for Surface Engineering
Source: Hindawi journal article supplement (doi:10.1155/2008/383020), 2008-01-01

UV-VIS (top) and fluorescence-spectrum (bottom) of *NPI*.

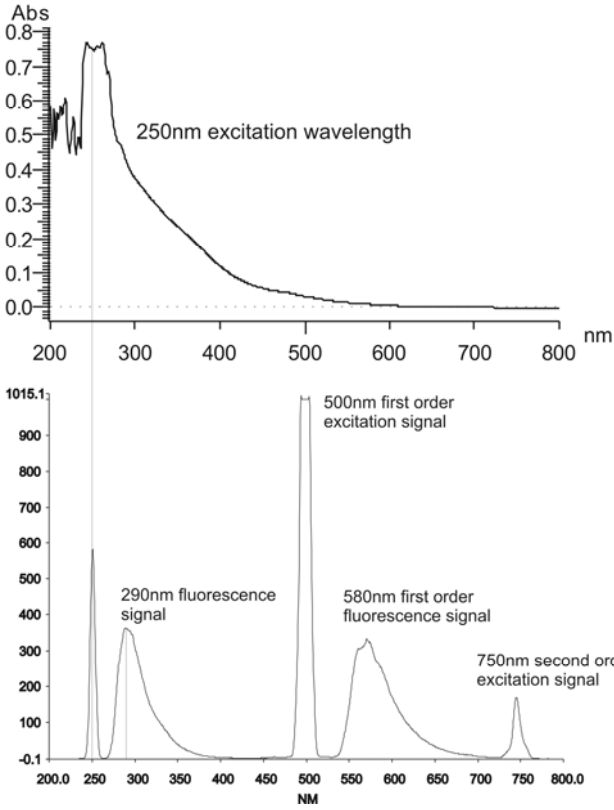

Supplement: f1 [file 383020.f1.pdf]
